# Supplementary material for: Effects of Water Content and Temperature on Bulk Resistivity of Hybrid Cement/Carbon Nanofiber Composites
Source: MDPI journal article supplement (doi:10.3390/ma13132884), 2020-06-27
Supplement: s1 [file s1]

Supporting information

# Effects of Water Content and Temperature on Bulk Resistivity of Hybrid Cement/Carbon Nanofiber Composites

Kamila Gawel <sup>1,\*</sup>, Mohammad Ali Taghipour Khadrbeik <sup>1</sup>, Ruben Bjørge <sup>1</sup>, Sigurd Wenner <sup>1</sup>, Bartłomiej Gawel <sup>2</sup>, Amir Ghaderi <sup>1</sup> and Pierre Cerasi <sup>1</sup>

<sup>1</sup> SINTEF Industry, P.O.Box 4760 Torgarden, 7465 Trondheim, Norway;

MohammadAli.TaghipourKhadrbeik@sintef.no (M.A.T.K.); ruben.bjorge@sintef.no (R.B.);

sigurd.wenner@sintef.no (S.W.); Amir.Ghaderi@sintef.no (A.G.); pierrerolf.cerasi@sintef.no (P.C.)

<sup>2</sup> Department of Materials Science and Engineering, Norwegian University of Science and Technology, Sem Sælands vei 12, 7491 Trondheim, Norway; bartlomiej.gawel@ntnu.no

\* Correspondence: kamila.gawel@sintef.no; Tel.: +47-9424-4083

Received: 15 May 2020; Accepted: 22 June 2020; Published: date

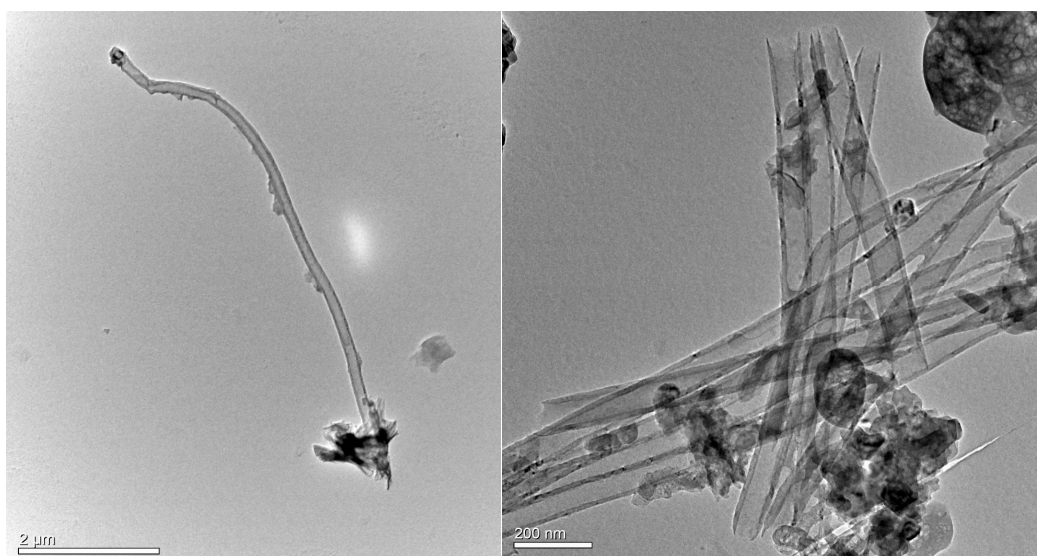

**Figure S1.** TEM image of carbon nanofibers extracted from the cement sample K1 and K2.

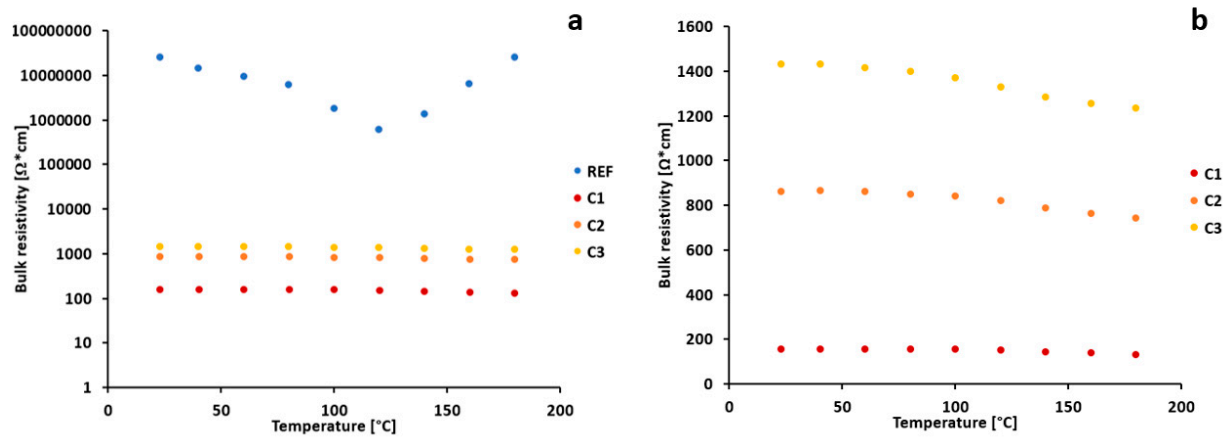

**Figure S2.** Resistivity changes upon temperature increase for samples with different water to cement ratio C1(w/c=0.49) C2 (w/c= 0.58) C3 (w/c= 0.66) and the reference sample (REF) without carbon nanofibers).

Due to very high resistivity values for the reference sample without CNFs the measured changes in bulk resistivity are not reliable.

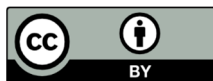

© 2020 by the authors. Licensee MDPI, Basel, Switzerland. This article is an open access article distributed under the terms and conditions of the Creative Commons Attribution (CC BY) license (<http://creativecommons.org/licenses/by/4.0/>).
